# Supplementary material for: Poplar Hot Water Extract Enhances Barrier and Antioxidant Properties of Chitosan/Bentonite Composite Film for Packaging Applications
Source: MDPI journal article supplement (doi:10.3390/polym11101614), 2019-10-04
Supplement: s1 [file s1]

# Poplar Hot Water Extract Enhances Barrier and Antioxidant Properties of Chitosan/Bentonite Composite Film for Packaging Applications

Mengya Sun <sup>1</sup>, Na Liu <sup>1,\*</sup>, Shuzhen Ni <sup>1,2</sup>, Huiyang Bian <sup>2</sup>, Yingjuan Fu <sup>1</sup> and Xiaoqian Chen <sup>1</sup>

<sup>1</sup> State Key Laboratory of Biobased Material and Green Papermaking, Qilu University of Technology, Shandong Academy of Sciences, Jinan 250353, China; [sunmengyade@163.com](mailto:sunmengyade@163.com) (M.S.)

<sup>2</sup> Jiangsu Co-Innovation Center for Efficient Processing and Utilization of Forest Resources, Nanjing Forestry University, Nanjing, 210037, China; [hybian1992@njfu.edu.cn](mailto:hybian1992@njfu.edu.cn) (H.B.)

\* Correspondence: [liuna@qlu.edu.cn](mailto:liuna@qlu.edu.cn) (N.L.)

**Table S1 Concentration of hemicellulose-derived saccharides in poplar hot water extract.  
(HWE concentration is 22.6 g/L)**

|           | Concentration (g/L) |                 | Concentration (g/L) |
|-----------|---------------------|-----------------|---------------------|
| xylose    | 6.77                | Oligo-xylose    | 3.75                |
| glucose   | 0.75                | Oligo-glucose   | 1.29                |
| galactose | 0.66                | Oligo-galactose | 0.32                |
| mannose   | 0.41                | Oligo-mannose   | 0.20                |
| arabinose | 0.19                | Oligo-arabinose | --                  |

**Table S2 Compositions (wt % total saccharides) of poplar hot water extract.**

|           | Compositions (wt %total<br>saccharides) |                 | Compositions (wt %total<br>saccharides) |
|-----------|-----------------------------------------|-----------------|-----------------------------------------|
| xylose    | 47.23                                   | Oligo-xylose    | 26.18                                   |
| glucose   | 5.20                                    | Oligo-glucose   | 9.02                                    |
| galactose | 4.59                                    | Oligo-galactose | 1.40                                    |
| mannose   | 2.88                                    | Oligo-mannose   | 2.21                                    |
| arabinose | 1.29                                    | Oligo-arabinose | --                                      |

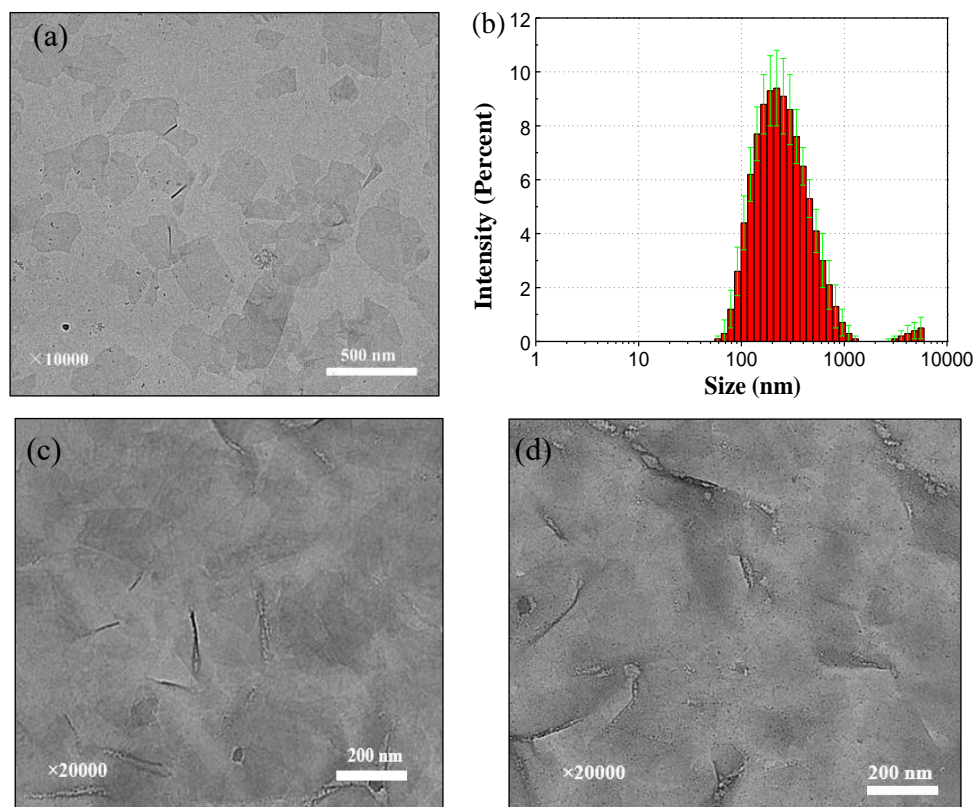

**Figure S1.** The TEM image of BT (a), particle size distribution diagram of BT (b), CS-BT<sub>10</sub> (c), CS-BT-HWE<sub>10</sub> (d).

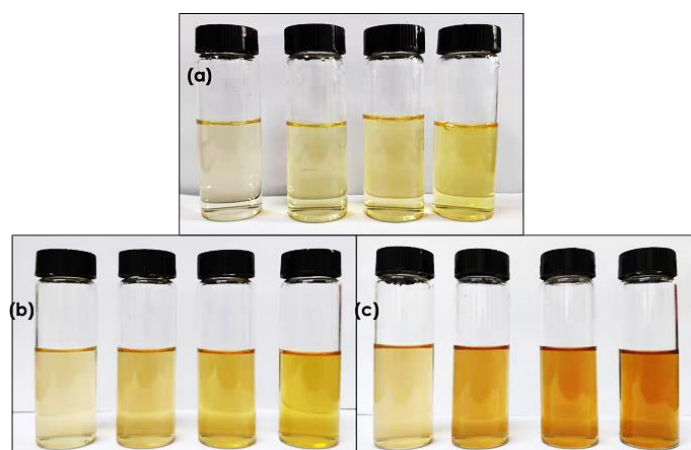

**Figure S2.** The presentation for the color of the mixture solution with different amounts of HWE added in the CS-BT-HWE system. (a) the water-BT-HWE system of which the chitosan in the CS-BT-HWE system was substituted by an equal volume of deionized water; (b) the initial CS-BT-HWE mixture solution before reaction; (c) the CS-BT-HWE system reacted at room temperature for 10 h (From left to right, the HWE amount is 10%; 20%; 30%, 40%, respectively.)

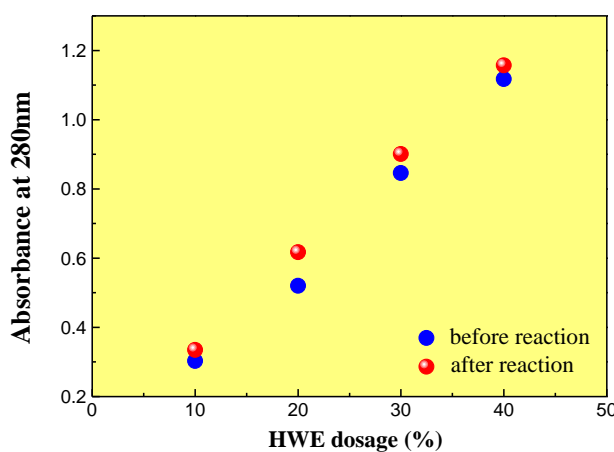

**Figure S3.** The absorbance of the initial CS-BT-HWE mixed solution (●) and mixing for 10 h (●). (n=3)
